# Supplementary material for: Synthesis of doped zinc blende-phase InSe:M (M = Fe and Co) nanocrystals for diluted magnetic semiconductor nanomaterials
Source: Royal Society of Chemistry journal article supplement (doi:10.1039/c3ce26872a), 2013-01-01
Supplement: c3ce26872a.pdf [file c3ce26872a.pdf]

## Synthesis of doped zinc blende-phase InSe:M (M=Fe and Co) nanocrystals for diluted magnetic semiconductor nanomaterials

Jiajia Ning,<sup>a, §, #</sup> Guanjun Xiao,<sup>a, §</sup> Chunzhong Wang,<sup>b</sup> Bingbing Liu,<sup>a</sup> Guangtian Zou,<sup>a</sup> and Bo Zou<sup>\*a</sup>

\* Corresponding author.

E-mail: [zoubo@jlu.edu.cn](mailto:zoubo@jlu.edu.cn)

<sup>a</sup> State Key Laboratory of Superhard Materials, Jilin University, Changchun 130012, P. R. China

<sup>b</sup> Key Laboratory of Physics and Technology for Advanced Batteries (Ministry of Education), College of Physics, Jilin University, Changchun, 130012, P. R. China

<sup>§</sup> These authors contributed equally to this work.

<sup>#</sup> The author's new address is:

State Key Laboratory of Catalysis, Dalian Institute of Chemical Physics, Chinese Academy of Science and Dalian National Laboratory for Clean Energy, 457 Zhongshan Road, Dalian 116023, P. R. China

E-mail: [jjning@dicp.ac.cn](mailto:jjning@dicp.ac.cn)

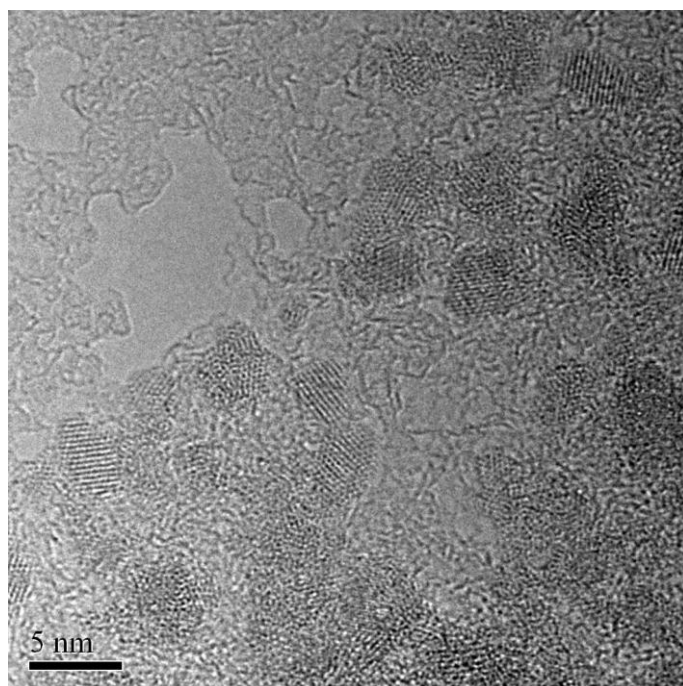

**Fig. S1** HRTEM image of ZB-InSe:Fe NCs with sphere-like morphologies. The crystallinity is good confirmed by the visible lattice fringes.

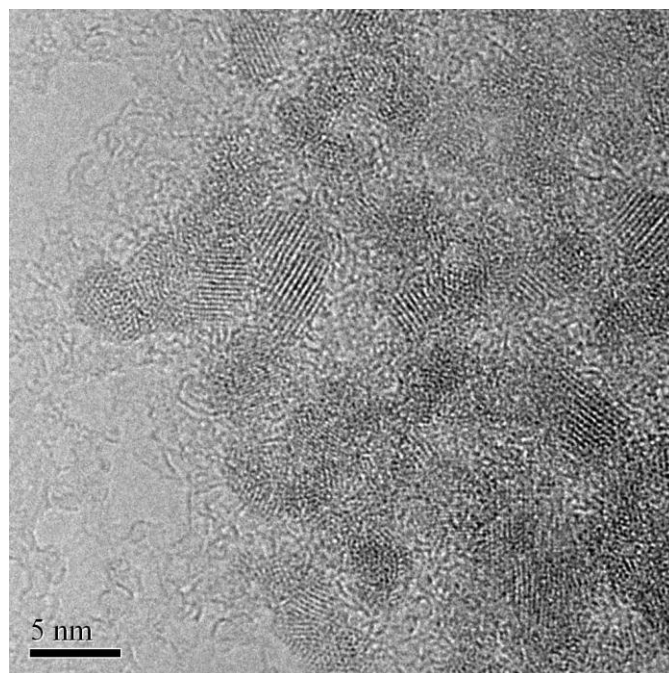

**Fig. S2** HRTEM image of ZB-InSe:Co NCs with worm-like shapes.

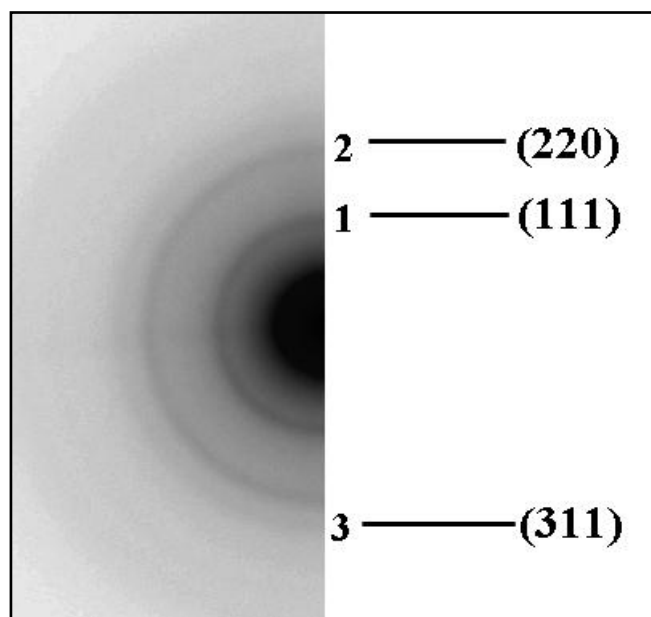

**Fig. S3** SAED pattern of doped ZB-InSe NCs. The diffraction rings are responding to (111), (220) and (311) crystal planes.

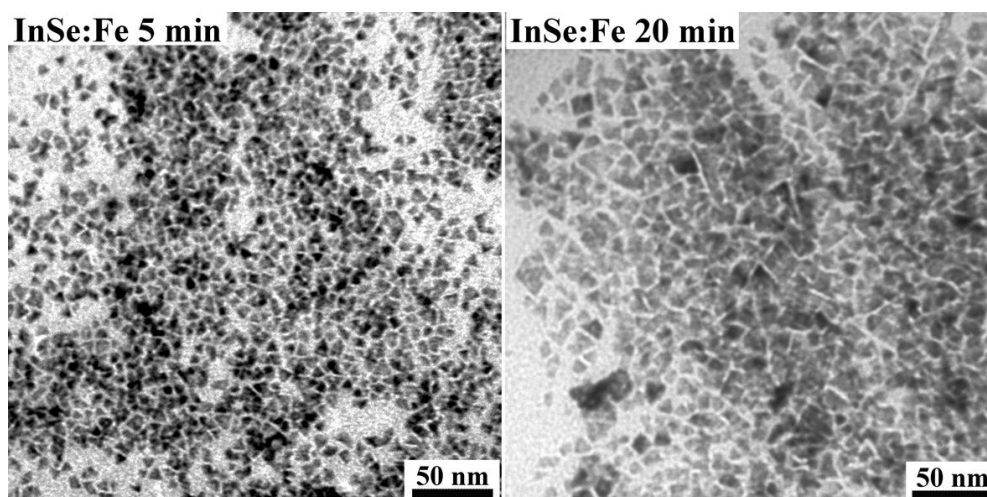

**Fig. S4** TEM images of ZB-InSe:Fe nanocrystals taken at different reaction time. Coupled with increasing reaction time, the size of nanocrystals increases and the shape still keep unchanged.

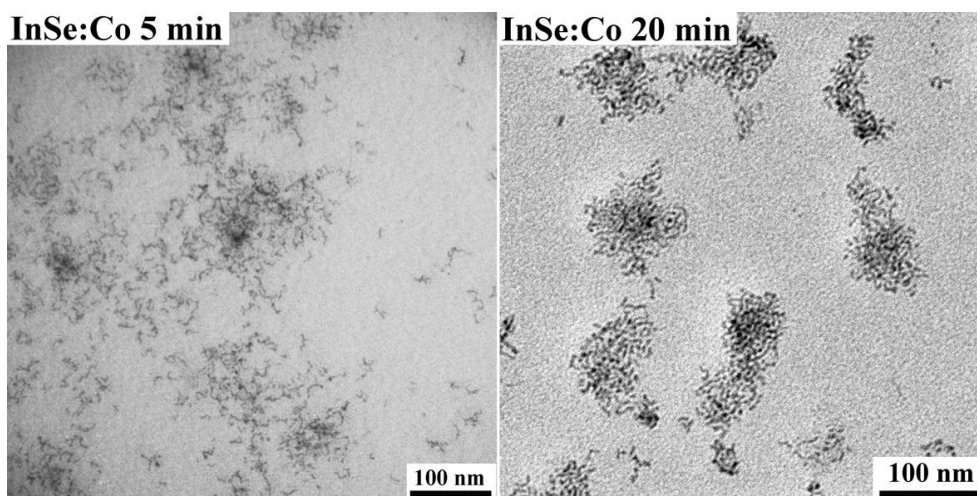

**Fig. S5** TEM images of ZB-InSe:Co nanocrystals taken at different reaction time. Coupled with increasing reaction time, the size of nanocrystals increases and the shape has not change.
